# Supplementary material for: Zinkgruvanite, Ba&lt;sub&gt;4&lt;/sub&gt;Mn&lt;sup&gt;2+&lt;/sup&gt;&lt;sub&gt;4&lt;/sub&gt;Fe&lt;sup&gt;3+&lt;/sup&gt;&lt;sub&gt;2&lt;/sub&gt;(Si&lt;sub&gt;2&lt;/sub&gt;O&lt;sub&gt;7&lt;/sub&gt;)&lt;sub&gt;2&lt;/sub&gt;(SO&lt;sub&gt;4&lt;/sub&gt;)&lt;sub&gt;2&lt;/sub&gt;O&lt;sub&gt;2&lt;/sub&gt;(OH)&lt;sub&gt;2&lt;/sub&gt;, a new ericssonite-group mineral from the Zinkgruvan Zn-Pb-Ag-Cu deposit, Askersund, Örebro County, Sweden
Source: Copernicus journal article supplement (doi:10.5194/ejm-33-659-2021), 2021-11-04
Supplement: Supplementary file [file ejm-33-659-2021-supplement-title-page.pdf › ejm-33-659-2021-supplement-title-page.pdf]

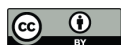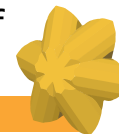

*Supplement of*

**Zinkgruvanite,  $\text{Ba}_4\text{Mn}_4^{2+}\text{Fe}_2^{3+}(\text{Si}_2\text{O}_7)_2(\text{SO}_4)_2\text{O}_2(\text{OH})_2$ , a new ericssonite-group mineral from the Zinkgruvan Zn-Pb-Ag-Cu deposit, Askersund, Örebro County, Sweden**

**Fernando Cámara et al.**

*Correspondence to:* Dan Holtstam ([dan.holtstam@nrm.se](mailto:dan.holtstam@nrm.se))

- [ejm-33-659-2021-supplement-title-page.pdf](#)
- [zinkgruvanite \(CIF\).cif](#)

The copyright of individual parts of the supplement might differ from the article licence.
